# Supplementary material for: Cu2O@PNIPAM core–shell microgels as novel inkjet materials for the preparation of CuO hollow porous nanocubes gas sensing layers
Source: Royal Society of Chemistry journal article supplement (doi:10.1039/c8tc01995a), 2018-01-01
Supplement: c8tc01995a1.pdf [file c8tc01995a1.pdf]

## Supporting Information

### **Cu<sub>2</sub>O@PNIPAM core-shell microgels as novel inkjet materials for the preparation of CuO hollow porous nanocubes gas sensing layers**

*He Jia, Haitao Gao, Shilin Mei, Janosch Kneer, Xianzhong Lin, Qidi Ran, Fuxian Wang, Stefan Palzer, Yan Lu\**



**Figure s1. The waveform used for jetting.**



**Figure s2. The photographs of the films of (a) bare Cu<sub>2</sub>O nanocubes and (b) Cu<sub>2</sub>O@PNIPAM core-shell nanoparticles with the same solid content of 0.026 wt. % on polystyrene (PS) substrates.**



**Figure s3.** TGA spectra of  $\text{Cu}_2\text{O}@$ PNIPAM core-shell nanoparticles.



**Figure s4.** The photos of  $\text{Cu}_2\text{O}@$ PNIPAM core-shell nanoparticles and bare  $\text{Cu}_2\text{O}$  nanocubes kept in water at room temperature for different time.



**Figure s5.** The photos of the droplets kept for 30 min for different samples: (a) bare  $\text{Cu}_2\text{O}$  nanocubes with 1.5 wt.% solid content, (b)  $\text{Cu}_2\text{O}@$ PNIPAM core-shell nanoparticles with 1.5 wt.% solid content and (c) bare  $\text{Cu}_2\text{O}$  nanocubes with 8 wt.% solid content.



**Figure s6.** (a, b, c) Overview SEM images of gas sensor devices of  $\text{Cu}_2\text{O}$  (1.5 wt.%),  $\text{Cu}_2\text{O}$  (8 wt.%) and  $\text{Cu}_2\text{O}@$ PNIPAM (1.5 wt.%) before heating treatment. (d) Overview SEM image of gas sensor device of  $\text{Cu}_2\text{O}@$ PNIPAM (1.5 wt.%) after heating treatment.



**Figure s7. SEM image of CuO hollow porous sensing layers.**
